# Supplementary material for: Molecular Dynamics Study on Structural and Atomic Evolution Between Au and Ni Nanoparticles Through Coalescence
Source: Research Square preprint supplement (doi:10.21203/rs.3.rs-500450/v1), 2021-05-11
Supplement: Supplementary file 1 [file d4613cdd4e2153f25b662df3.docx]

Molecular Dynamics Study on Structural and Atomic Evolution between Au and Ni Nanoparticles through Coalescence

Bangquan Li, 1,2 Jing Li1,Xiaoqiang Su1 and Yimin Cui3

1School of Physics and Electronics, Shanxi Datong University, Datong 037009, China

2Institute of Photoelectronic Thin Film Devices and Technology，Nankai University，

Tianjin 300350, China

3School of Physics, Beihang University, Beijing 100191, China

Table S1. The illustration of the radius for different NPs

|  | NP1 | NP2 | NP3 | NP4 |
| --- | --- | --- | --- | --- |
| Au radius (nm) | **1.50** | **2.50** | **3.20** | **4.60** |
| Ni radius (nm) | **2.9** | | | |
| Atomic ratio | Au0.01Ni0.99 | Au0.05Ni0.95 | Au0.1Ni0.9 | Au0.25Ni0.75 |
|  | **NP5** | **NP6** | **NP7** | **NP8** |
| Au radius (nm) | **5.80** | **6.64** | **7.62** | **9.60** |
| Atomic ratio | Au04Ni0.6 | Au0.5Ni0.5 | Au0.6Ni0.4 | Au0.75Ni0.25 |
| Ni radius (nm) | **2.9** | | | |


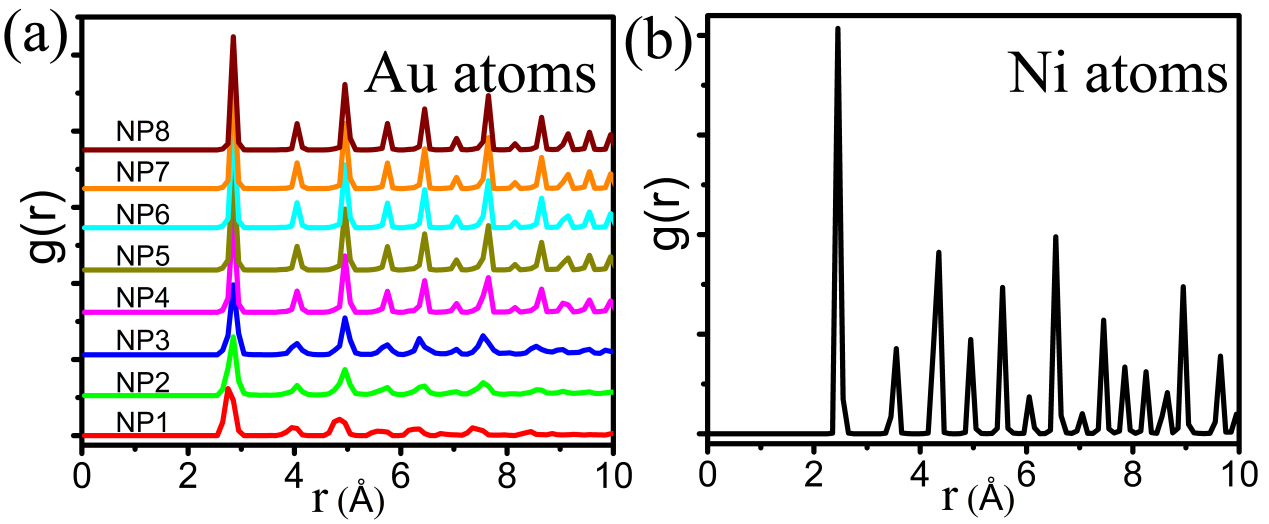


Fig. S1 PDF of Au atoms and Ni atoms at temperatures 0.1 K

Table S2 Five representative temperatures (K) of NP1-NP8 during the heating process

| Sample | T1 | T2 | T3 | T4 | T5 |
| --- | --- | --- | --- | --- | --- |
| NP1 | 97 | 960 | 1300 | 1401 | 1453 |
| NP2 | 288 | 960 | 1022 | 1423 | 1438 |
| NP3 | 300 | 922 | 1047 | 1380 | 1425 |
| NP4 | 464 | 712 | 1034 | 1340 | 1387 |
| NP5 | 558 | 907 | 1112 | 1271 | 1372 |
| NP6 | 477 | 874 | 1142 | 1281 | 1410 |
| NP7 | 247 | 1067 | 1142 | 1276 | 1452 |
| NP8 | 449 | 1087 | 1173 | 1319 | 1473 |


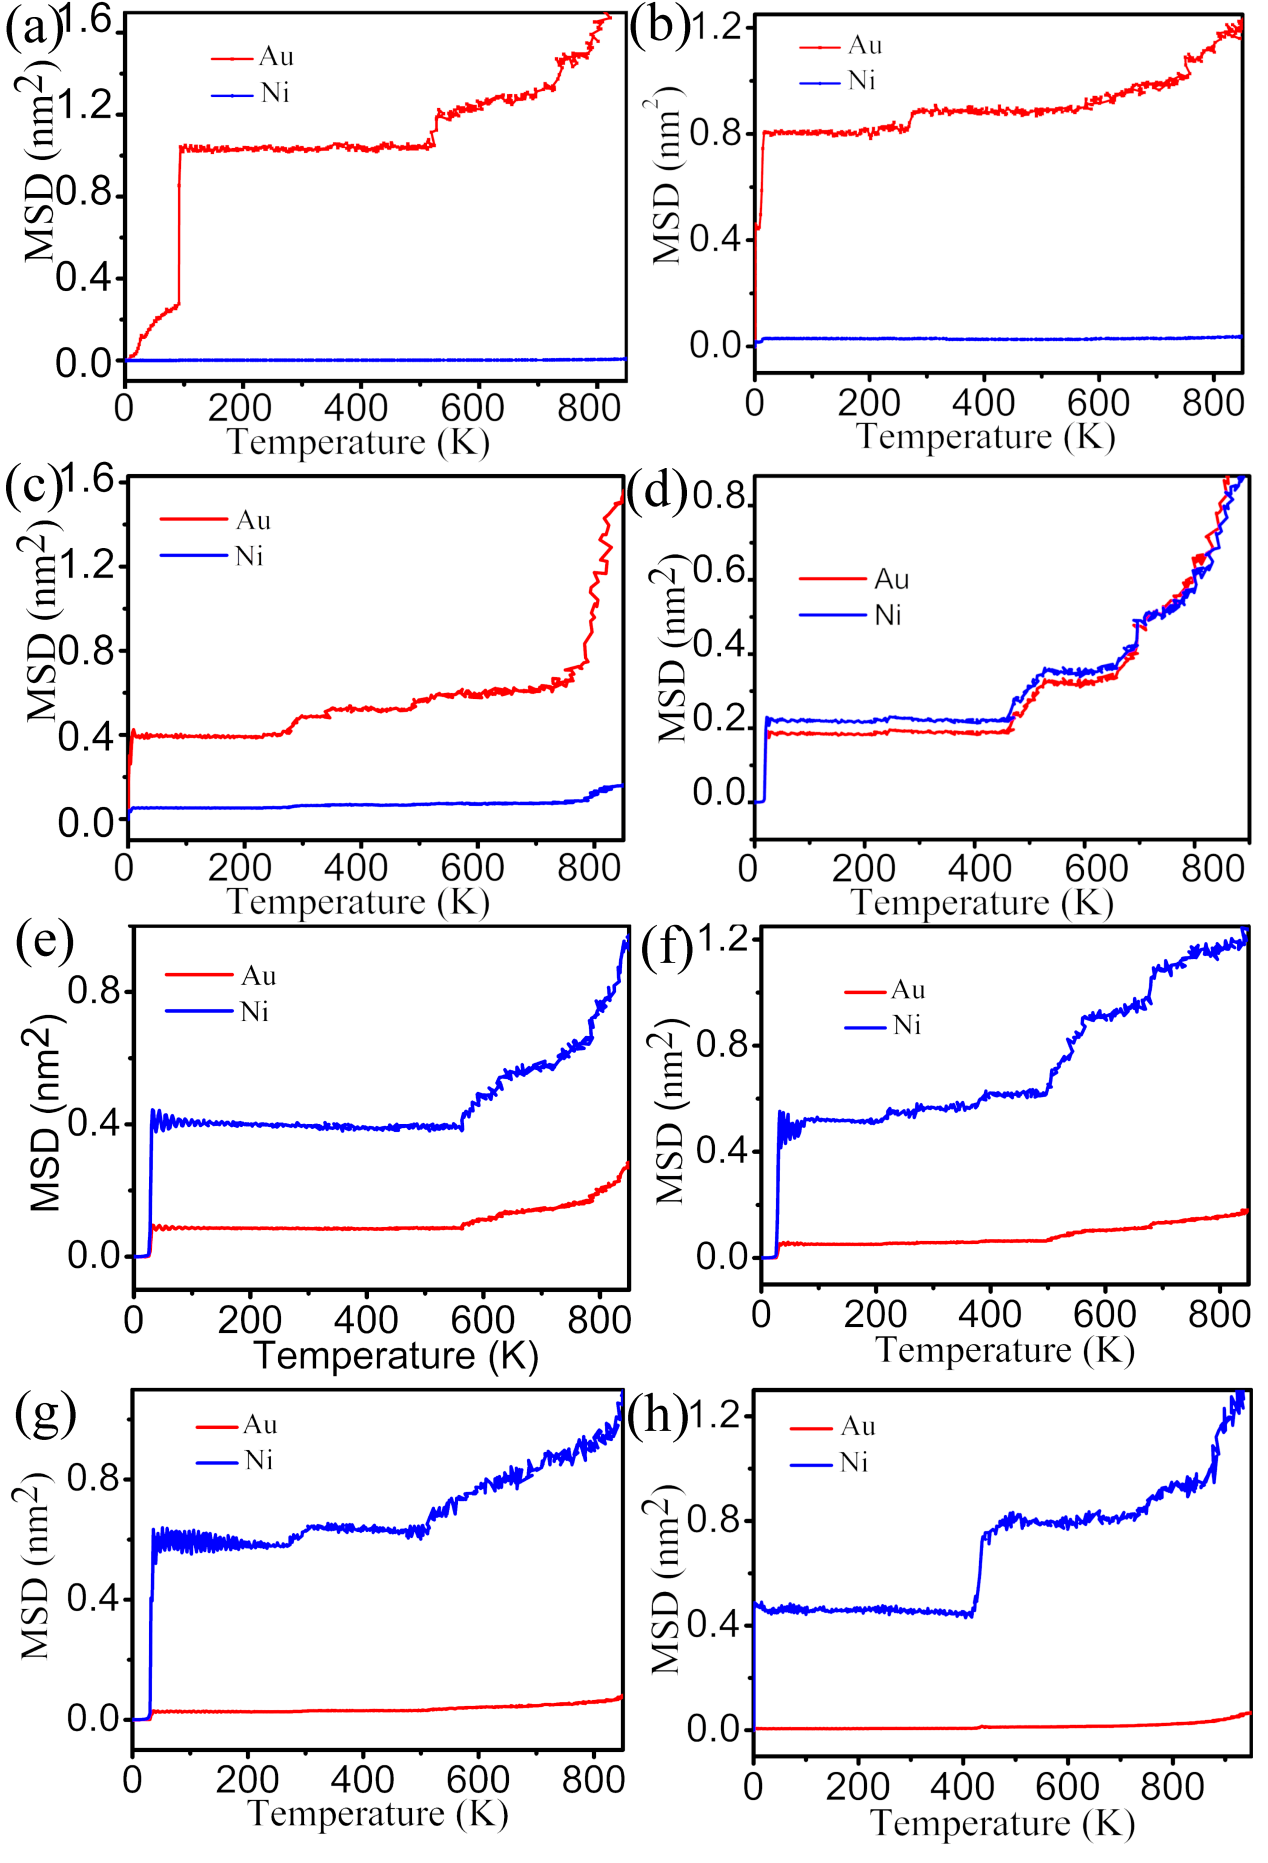


Fig. S2 MSD of Ni and Au atoms in (a) NP1, (b) NP2, (c) NP3, (d) NP4, (e) NP5, (f) NP6, (g) NP7, (h) NP8 during heating process.


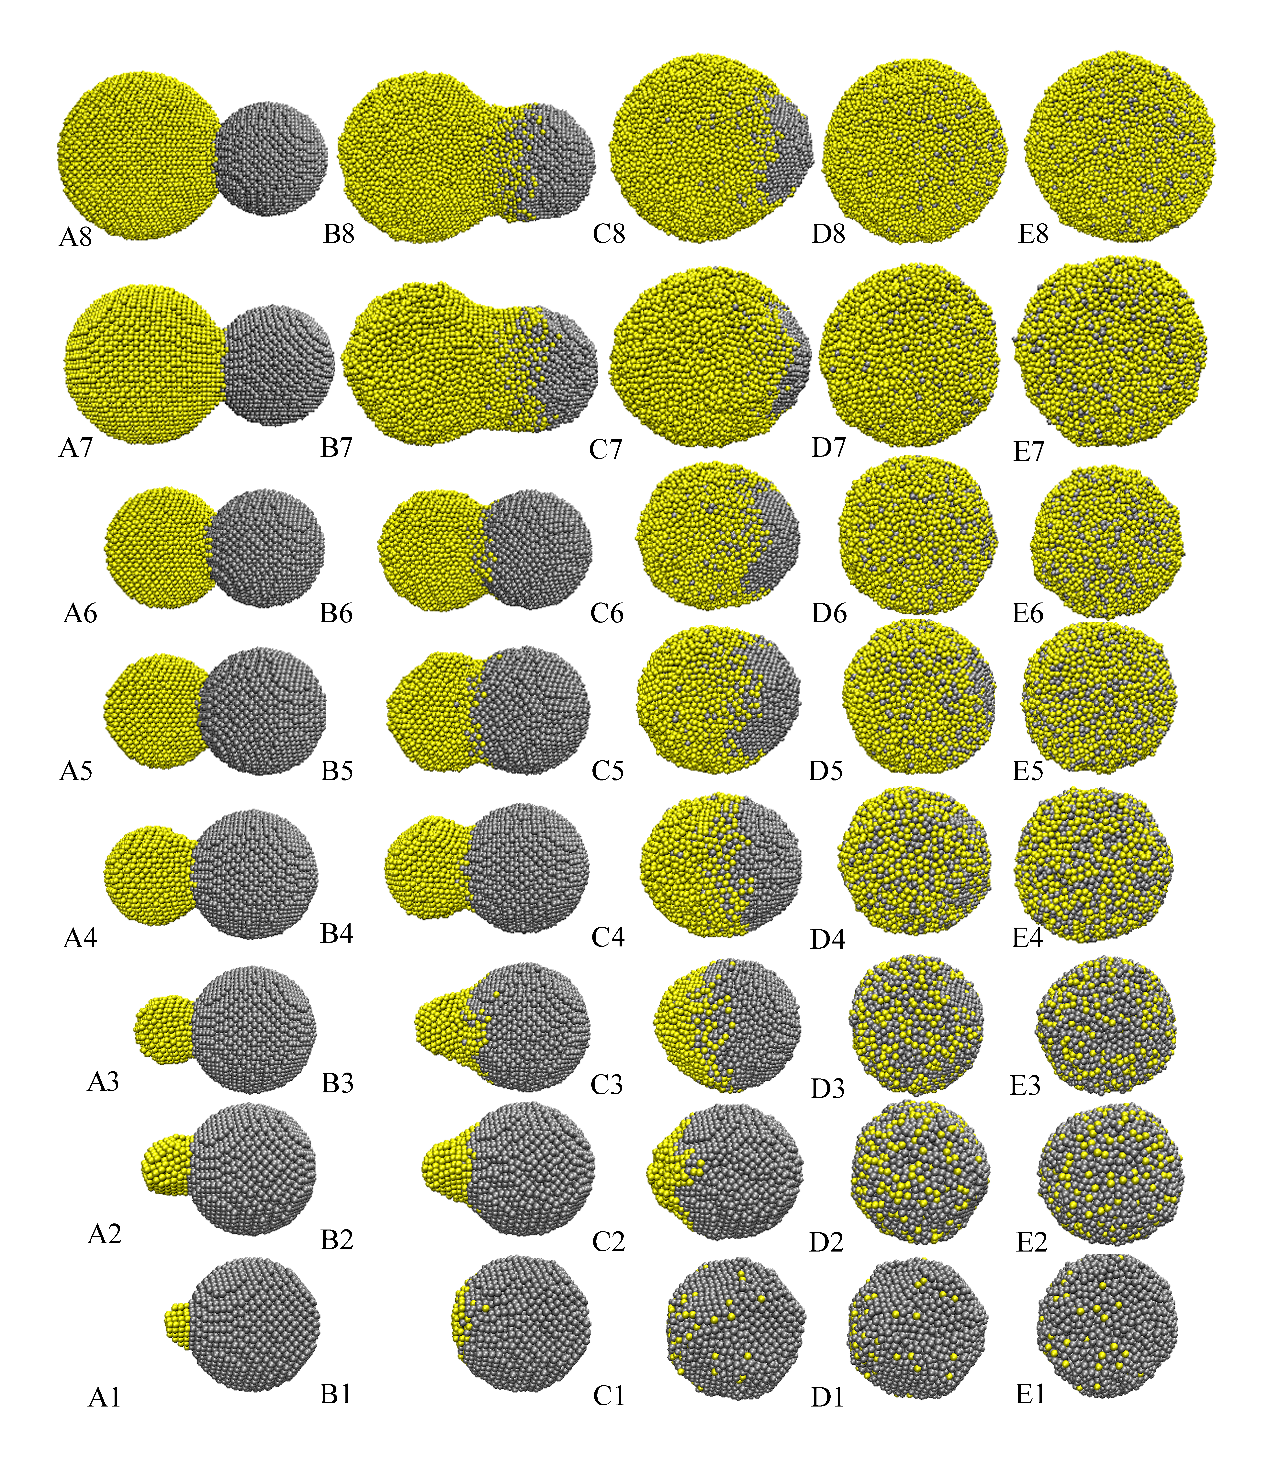


Fig. S3. Snapshots at different temperatures during the coalescence, Au and Ni atoms are colored in yellow and gray, respectively.
